# Supplementary material
Source: Research Square preprint supplement (doi:10.21203/rs.3.rs-8686230/v1)
Supplement: Supplementary file 1 [file 2e4ce052cb41b0c452308cb0.docx]

**buffalo primers:**

**cattle primers:**

| Primer  direction | Name of  primers | TRDV/TRDJ  gene sequence(5’-3’) | Primer position |
| --- | --- | --- | --- |
| Forward | TRDV1 | ACGGCCGCTACTCTGTAAAC | 185-204 |
|  | TRDV2 | GCCCCGGGTTTAAGGACAAC | 173-192 |
|  | TRDV3 | GTGCTGCATAGCATGAGCCA | 202-221 |
|  | TRDV4 | GTAAGGGGTGGTTTCAAAGGG | 178-198 |
|  | TRDV5 | GCACTCAAGGGAAGGACGAT | 162-181 |
| Reverse | TRDJ1 | TTGGTTCCACGATGAGGCGG | 35-54 |
|  | TRDJ2 | TCAGTTCCATGATGAGTTGAGTCT | 29-52 |
|  | TRDJ3 | GGCTCCACGAAGAGTTTGGT | 38-57 |
|  | TRDJ4 | CTGGTTCCACGTTCAGATAGGT | 28-49 |

| Primer  direction | Name of  primers | TRDV/TRDJ  gene sequence(5’-3’) | Primer position |
| --- | --- | --- | --- |
| Forward | TRDV1 | ACGGCCGCTACTCTGTAAAC | 185-204 |
|  | TRDV2 | GCCCTGGGTTTGAGGACAAC | 173-192 |
|  | TRDV3 | GGGTAGATTTACCGTGCAGC | 189-208 |
|  | TRDV4 | GTAAGGGGTAATTTCCAAGGG | 178-198 |
|  | TRDV5 | GGGAAGGACGATATTCTGTGG | 170-190 |
| Reverse | TRDJ1 | TTGGTTCCACGATGAGGCGG | 35-54 |
|  | TRDJ2 | CGGTTCCATGATGAGTTGAGTC | 32-53 |
|  | TRDJ3 | GCTCCACGAAGAGTTTGGTG | 37-56 |
|  | TRDJ4 | GGTTCCACATTCAGATAGGTTCC | 25-47 |
